# Supplementary material
Source: Springer Nature journal article supplement (https://www.springermedizin.de/resource/supplementary/12888_2011_1010_MOESM1_ESM.pdf/9479642)
Supplement: MOESM1 [file 9479642]

## Setting

### Data collection:

- Inpatient setting
- Outpatient setting
- Rehabilitation

## Screening

### Depression

(PHQ-9)

## Assessment

### Diagnostic Assessment

(Interview &

### Study participation:

Consecutive study enrolment,

PHQ-9

cutoff-value

$\geq 9$

100%

CIDI-O Interview  
and questionnaires

50%

Randomization

Questionnaires

$< 9$
